# Supplementary material for: Major Histocompatibility Complex–Matched Arteries Have Similar Patency to Autologous Arteries in a Mauritian Cynomolgus Macaque Major Histocompatibility Complex–Defined Transplant Model
Source: PubMed Central journal article supplement — J Am Heart Assoc. 2019 Jul 17;8(15):e012135. doi: 10.1161/JAHA.119.012135 (PMC6761673; doi:10.1161/jaha.119.012135), 2019-07-17
Supplement: JAH3-8-e012135-s001.pdf [file JAH3-8-e012135-s001.pdf]

# **SUPPLEMENTAL MATERIAL**

**Table S1. Autograft patency.**

| <b>Animal ID</b> | <b>Sex</b> | <b>Haplotype</b> | <b>Matching</b>  | <b>Days Post-Surgery</b> | <b>Explant Patency</b> |
|------------------|------------|------------------|------------------|--------------------------|------------------------|
| Cy0665           | M          | M1/M3            | Surgical Control | 448                      | Yes                    |
| Cy0674           | F          | M1/M3            | Surgical Control | 490                      | No                     |
| Cy0683           | M          | M1/M6            | Surgical Control | 364                      | Yes                    |
| Cy0672           | F          | M3/M3            | Surgical Control | 500                      | No                     |
| Cy0676           | M          | M3/M3            | Surgical Control | 448                      | Yes                    |
| Cy0661           | F          | M3/M3            | Surgical Control | 364                      | No                     |
| Cy0682           | M          | M1/M1            | Surgical Control | 364                      | No                     |
| Cy0673           | F          | M1/M3            | Surgical Control | 521                      | Yes                    |
| Cy0700           | F          | M5/M6            | Surgical Control | 521                      | No                     |
| Cy0694           | F          | M3/M3            | Surgical Control | 350                      | Yes                    |
| Cy0695           | F          | M4/M4            | Surgical Control | 350                      | Yes                    |

**Table S2. Donor specific antibody (DSA).**

| Animal ID | Sex | Haplotype | Radial Artery Swap Direction | DSA                 |                |                     |
|-----------|-----|-----------|------------------------------|---------------------|----------------|---------------------|
|           |     |           |                              | <i>Pre-existing</i> | <i>De Novo</i> | <i>Target Donor</i> |
| Cy0665    | M   | M1/M3     | M1/M3→M3/M3                  | No                  | No             | --                  |
| Cy0676    | M   | M3/M3     | M3/M3→M1/M3                  | No                  | No             | --                  |
| Cy0682    | M   | M1/M1     | M1/M1→M1/M6                  | No                  | No             | --                  |
| Cy0683    | M   | M1/M6     | M1/M6→M1/M1                  | No                  | No             | --                  |
| Cy0680    | M   | M1/M1     | M1/M1→M1/M2                  | No                  | No             | --                  |
| Cy0681    | M   | M1/M2     | M1/M2→M1/M1                  | No                  | No             | --                  |
| Cy0660    | M   | M3/M3     | M3/M3→M1/M3                  | No                  | No             | --                  |
| Cy0666    | M   | M1/M3     | M1/M3→M3/M3                  | No                  | No             | --                  |
| Cy0672    | F   | M3/M3     | M3/M3→M3/M6                  | No                  | No             | --                  |
| Cy0675    | F   | M3/M6     | M3/M6→M3/M3                  | No                  | No             | --                  |
| Cy0661    | F   | M3/M3     | M3/M3→M1/M3                  | No                  | No             | --                  |
| Cy0674    | F   | M1/M3     | M1/M3→M3/M3                  | No                  | No             | --                  |
| Cy0673    | F   | M1/M3     | M1/M3→M5/M6                  | No                  | No             | --                  |
| Cy0700    | F   | M5/M6     | M5/M6→M1/M3                  | No                  | <b>Yes</b>     | Cy0673              |
| Cy0694    | F   | M3/M3     | M3/M3→M4/M4                  | No                  | No             | --                  |
| Cy0695    | F   | M4/M4     | M4/M4→M3/M3                  | No                  | No             | --                  |
| Cy0692    | F   | M2/M4     | M2/M4→NMC                    | No                  | No             | --                  |
| Cy0613    | F   | NMC       | NMC→M2/M4                    | No                  | No             | --                  |

A summary of transplant donor:recipient pair DSA detection is shown. Radial artery swap direction indicates recipient serum bound to donor PBMC (Recipient Serum→Donor PBMC). Animals grouped by transplant pairs. NMC, non-Mauritian cyno

**Figure S1. Pre-transplant donor-specific antibodies.**

**Pre-Transplant Donor-Specific Antibody (DSA)**

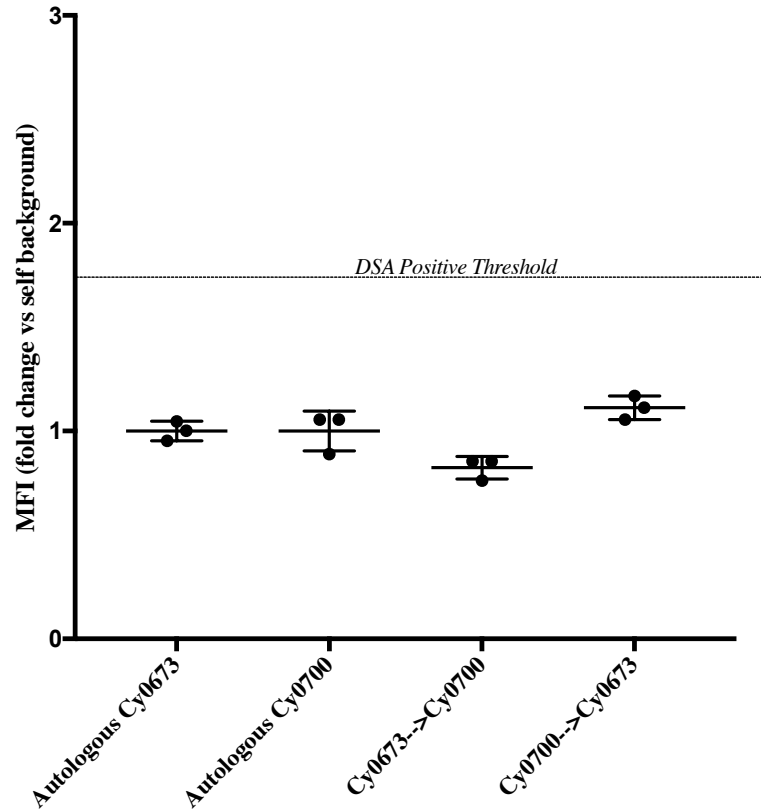

Representative graph summarizing the pre-transplant results of one experiment showing DSA positive pair Cy0700 and Cy0673.

**Figure S2. Assessment of cell identity within allografts. A.**

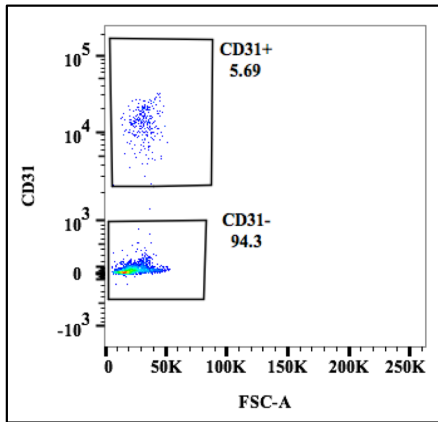

Cy0682/Cy0683

**C.**

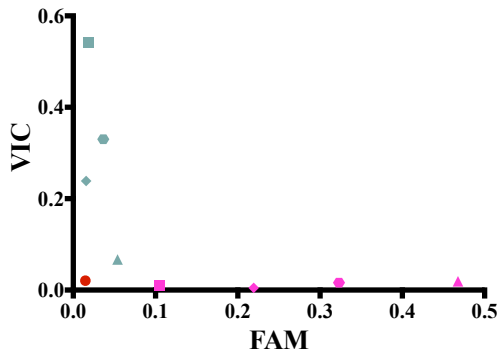

▲ Cy0682 CD31+ Left    ▲ Cy0683 CD31+ Left  
 ◆ Cy0682 CD31- Left    ◆ Cy0683 CD31- Left  
 ■ Cy0682 CD31+ Right    ■ Cy0683 CD31+ Right  
 ● Cy0682 CD31- Right    ● Cy0683 CD31- Right  
 ● H2O Ctl

**B.**

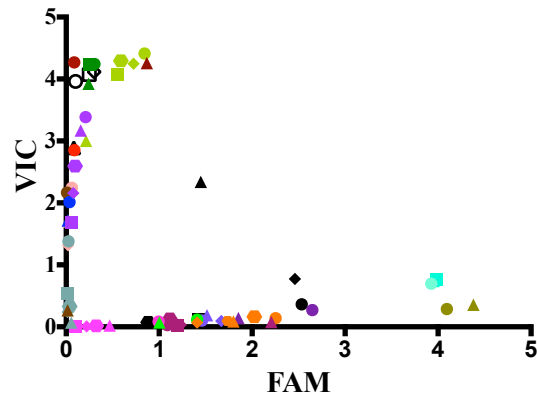

Cy0694/Cy0695

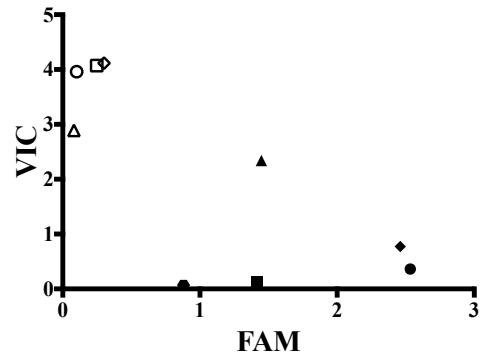

○ Cy0694 Ctl    ● Cy0695 Ctl  
 ▲ Cy0694 CD31+ Left    ▲ Cy0695 CD31+ Left  
 ◆ Cy0694 CD31- Left    ◆ Cy0695 CD31- Left  
 □ Cy0694 CD31+ Right    ■ Cy0695 CD31+ Right  
 ● Cy0695 CD31- Right

At end of study, radial artery grafts were explanted. The proximal and distal anastomosis sites were saved for sectioning and staining while the middle of the graft was processed and analyzed for the presence of host/donor cells. (A) The graft was digested and individual graft cells were sorted for CD31+ and CD31- populations. Shown is a representative sort for CD31 cells. (B) Plot of SNP analysis results from all samples in the study. (C) Plot of SNP analysis results from a partial haplomatch (left panel) and complete mismatch animal (right panel) that showed a mixture host and donor endothelial cells within the graft.
